# Supplementary material for: Sensitivities of mean and extreme streamflow to climate variability across Europe
Source: Copernicus journal article supplement (doi:10.5194/egusphere-2025-5139), 2025-10-24
Supplement: Supplementary file 2 [file 2025_HemshornDeSanchez_HESS_Graphical-Abstract.pdf › 2025_HemshornDeSanchez_HESS_Graphical-Abstract.pdf]

# ? HOW DOES ANNUAL MEAN AND EXTREME STREAMFLOW RESPOND TO VARIABILITY IN CLIMATE?

ESTREAMS DATA

ELASTICITIES / SENSITIVITIES DERIVED FROM MULTIPLE LINEAR REGRESSION PER CATCHMENT

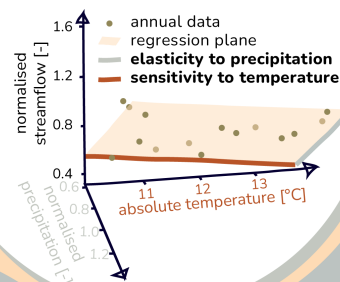

ANNUAL FLOWS INCREASE WITH MORE ANNUAL PRECIPITATION

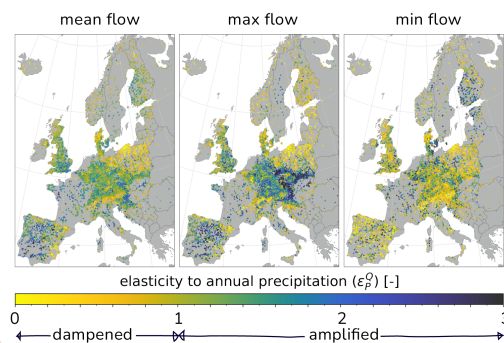

MAX FLOWS ARE MOST AND MIN FLOWS ARE LEAST SENSITIVE TO ANNUAL PRECIPITATION

FLAWS CAN BOTH DECREASE AND INCREASE WITH HIGHER TEMPERATURES

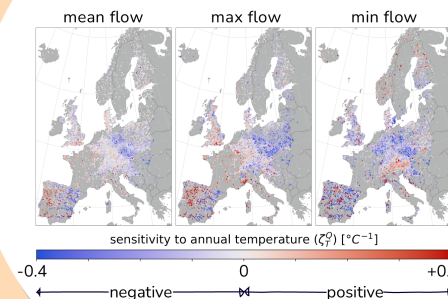

BUT TEMPERATURE HAS LIMITED INFLUENCE ON ANNUAL STREAMFLOW

MULTIPLE DRIVERS OF MEAN-STREAMFLOW ELASTICITY TO PRECIPITATION

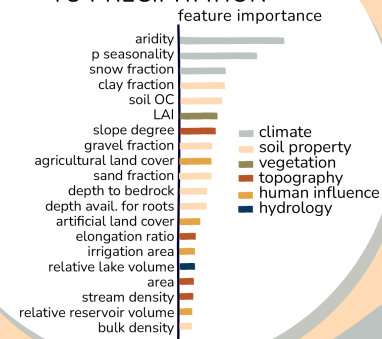

WITH THESE CHARACTERISTICS WE CAN ONLY DESCRIBE ~50% OF THE ELASTICITY

RANDOM FOREST MODEL

HEMSHORN DE SÁNCHEZ ET AL.

! THIS STUDY ADVANCES UNDERSTANDING OF HYDROLOGICAL RESPONSE AND SUPPORT WATER MANAGEMENT AND HAZARD RISK MITIGATION
